# Supplementary material for: Ligand-modulated folding of the full-length adenine riboswitch probed by NMR and single-molecule FRET spectroscopy
Source: PubMed Central journal article supplement — Nucleic Acids Res. 2017 Feb 15;45(9):5512–22. doi: 10.1093/nar/gkx110 (PMC5605240; doi:10.1093/nar/gkx110), 2017-02-15
Supplement: gkx110_Supp.pdf [file gkx110_Supp.pdf]

# **Ligand-modulated folding of the full-length adenine riboswitch probed by NMR and single-molecule FRET spectroscopy**

Sven Warhaut<sup>1</sup>, Klara Rebecca Mertinkus<sup>1</sup>, Philipp Höllthaler<sup>2,3</sup>, Boris Fürtig<sup>1</sup>, Mike Heilemann<sup>2</sup>, Martin Hengesbach<sup>1</sup> and Harald Schwalbe<sup>1\*</sup>

<sup>1</sup> Institute of Organic Chemistry and Chemical Biology, Centre for Biomolecular Magnetic Resonance (BMRZ), Johann Wolfgang Goethe-Universität, Frankfurt am Main, Hessen, 60438, Germany

<sup>2</sup> Institute of Physical and Theoretical Chemistry, Johann Wolfgang Goethe-Universität, Frankfurt am Main, Hessen, 60438, Germany

\* To whom correspondence should be addressed. Tel: +49 69 7982 9737; Fax: +49 69 7982 9515;  
Email: Schwalbe@nmr.uni-frankfurt.de

Present Address: Philipp Höllthaler, Institute of Biochemistry, Biocenter, Johann Wolfgang Goethe-Universität, Frankfurt am Main, Hessen, 60438, Germany

## Supplementary Tables

**Supplementary Table S1.** PCR amplified DNA templates used for *in vitro* transcription (written in 5' to 3' direction)<sup>a</sup>

|                                             |                                                                                                                                                                                                                      |
|---------------------------------------------|----------------------------------------------------------------------------------------------------------------------------------------------------------------------------------------------------------------------|
| <sup>112</sup> Asw DNA wt                   | TAATACGACTCACTATAGGGAGA-TGAAGCCTGATGAGAGCGAAAGC<br>TCGAAACAGCTGTGAAGCTGTC-GCTTCATATAATCCTAATGATATGG<br>TTTGGGAGTTTCTACCAAGAGCCTTAACTCTTGATTATGAAGTCTGT<br>CGCTTTATCCGAAATTTTATAAAGAGAAGACTCATGAAT                    |
| <sup>112</sup> Asw DNA apoB <sub>STAB</sub> | TAATACGACTCACTATAGGGAGA-ATGGCGCCTGATGAGAGCGAAAG<br>CTCGAAACAGCTGTGAAGCTGTC-GC <u>G</u> CCATATAATCCTAATGATATG<br>GTTTGGG <u>C</u> GTTTCTACCAAGAGCCTTAACTCTTGATTATGAAGTCT<br>GTCGCTTTATCCGAAATTTTATAAAGAGAAGACTCATGAAT |
| Forward Primer                              | TAATACGACTCACTATAGG                                                                                                                                                                                                  |
| Reverse Primer                              | ATTCATGAGTCTTCTCTTTAT                                                                                                                                                                                                |

<sup>a</sup> T7 promoter and hammerhead ribozyme sequences are depicted in grey; mutated residues are underlined

**Supplementary Table S2.** Oligonucleotide sequences used for DNA splinted enzymatic RNA ligation (written in 5' to 3' direction)<sup>a</sup>

|                                                            |                                                                                                                         |
|------------------------------------------------------------|-------------------------------------------------------------------------------------------------------------------------|
| <sup>112</sup> Asw RNA<br>Fragment 1, wt                   | GCUUCAUAUAAUCCUAAUGAUA(5-N-U)GGUUUGGGAGUUUCUAC                                                                          |
| <sup>112</sup> Asw RNA<br>Fragment 1, apoB <sub>STAB</sub> | GCG <u>C</u> CAUAUAAUCCUAAUGAUA(5-N-U)GGUUUGGG <u>C</u> GUUUCUAC                                                        |
| <sup>112</sup> Asw RNA<br>Fragment 1, apoA <sub>STAB</sub> | GCUUCAUAUAAUCCU <u>C</u> GUGAUA(5-N-U)GGU <u>C</u> GGGAGUUUCUAC                                                         |
| <sup>112</sup> Asw RNA<br>Fragment 2                       | p-CAAGAGCC(5-N-U)UAAACUCUUGAUUAUGAAGUCUGUC                                                                              |
| <sup>112</sup> Asw RNA<br>Fragment 3                       | p-GCUU(5-N-U)AUCCGAAAUUUUUAAAGAGAAGACUCAUGAAU-bi                                                                        |
| DNA Splint                                                 | ATTCATGAGTCTTCTCTTTATAAAATTTCCGATAAAGCGACAGACTTC<br>ATAATCAAGAGTTTAAGGCTCTTGGTAGAACTCCCAAACCATATCAT<br>TAGGATTATATGAAGC |

<sup>a</sup> Mutated residues are underlined; abbreviations: 5-amino allyl modified uridine (5-N-U), 5'-phosphate (p), 3'-biotin linker (bi)

**Supplementary Table S3.** Bulk fluorescence anisotropies of Cy3 (Ex/Em = 525 nm / 565 nm) and Cy5 (Ex/Em = 625 nm / 665 nm) in the free form and in the RNA-coupled form at the selected labelling sites of the full-length 112-nucleotide *add* Asw<sup>a</sup>

| <b>Construct</b>           | <b>r</b>      |
|----------------------------|---------------|
| Cy3 free                   | 0.244 ± 0.006 |
| <sup>112</sup> Asw L2(Cy3) | 0.285 ± 0.004 |
| <sup>112</sup> Asw P5(Cy3) | 0.296 ± 0.004 |
| Cy5 free                   | 0.127 ± 0.004 |
| <sup>112</sup> Asw L3(Cy5) | 0.238 ± 0.009 |
| <sup>112</sup> Asw P5(Cy5) | 0.281 ± 0.008 |

<sup>a</sup> The fluorescence anisotropy *r* was measured at a concentration of ~4 nM single-fluorophore-labelled riboswitch in smFRET immobilization buffer (25 mM K<sub>2</sub>HPO<sub>4</sub>/KH<sub>2</sub>PO<sub>4</sub>, 50 mM KCl, pH 7.0) with 2 mM Mg<sup>2+</sup> at 20 °C. The errors are standard errors obtained over 20 replicates.

## Supplementary Figures

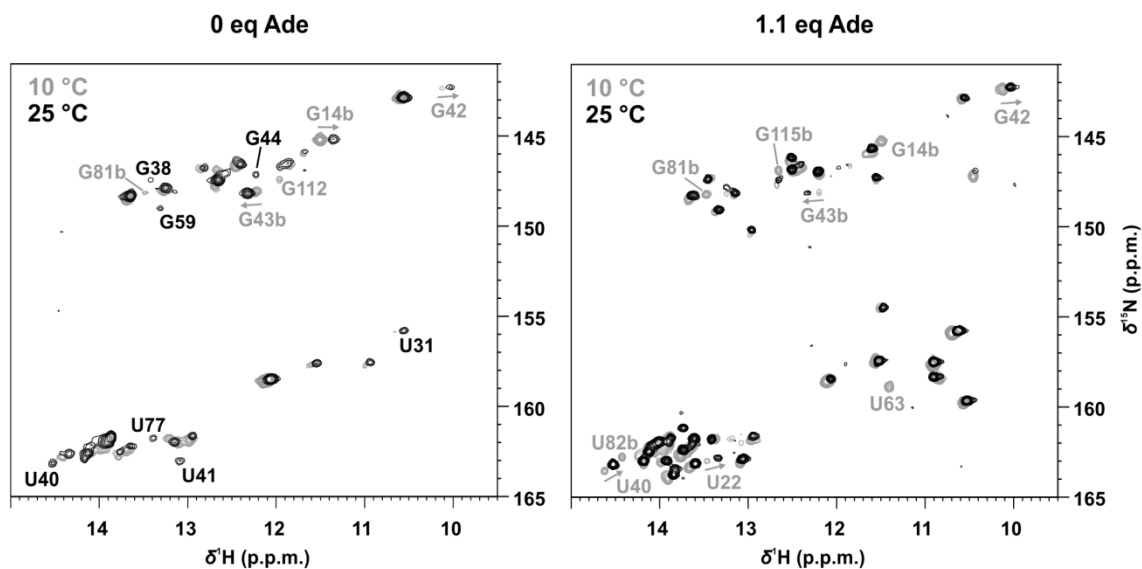

**Supplementary Figure S1.** Overlay of the imino region of the  $^1\text{H},^{15}\text{N}$ -BEST-TROSY spectrum of the *add* Asw measured at 25 °C (black) with the assigned  $^1\text{H},^{15}\text{N}$ -HSQC spectrum measured at 10 °C (grey) without and with adenine in presence of 5 mM  $\text{Mg}^{2+}$ . Assigned signals that are missing or shifted beyond linewidth at 25 °C are annotated in grey. The missing signals G81b, U82b, G115b and G112 indicate a destabilization of base pairing in the P4 helix. Assigned signals that appear at 25 °C are annotated in black. U31, G38, U40, U41, G44, G59 and U77 indicate pre-folding of the apoA aptamer. The  $^1\text{H},^{15}\text{N}$ -HSQC spectra and their assignment at 10 °C were adapted from Reining et al. (2)

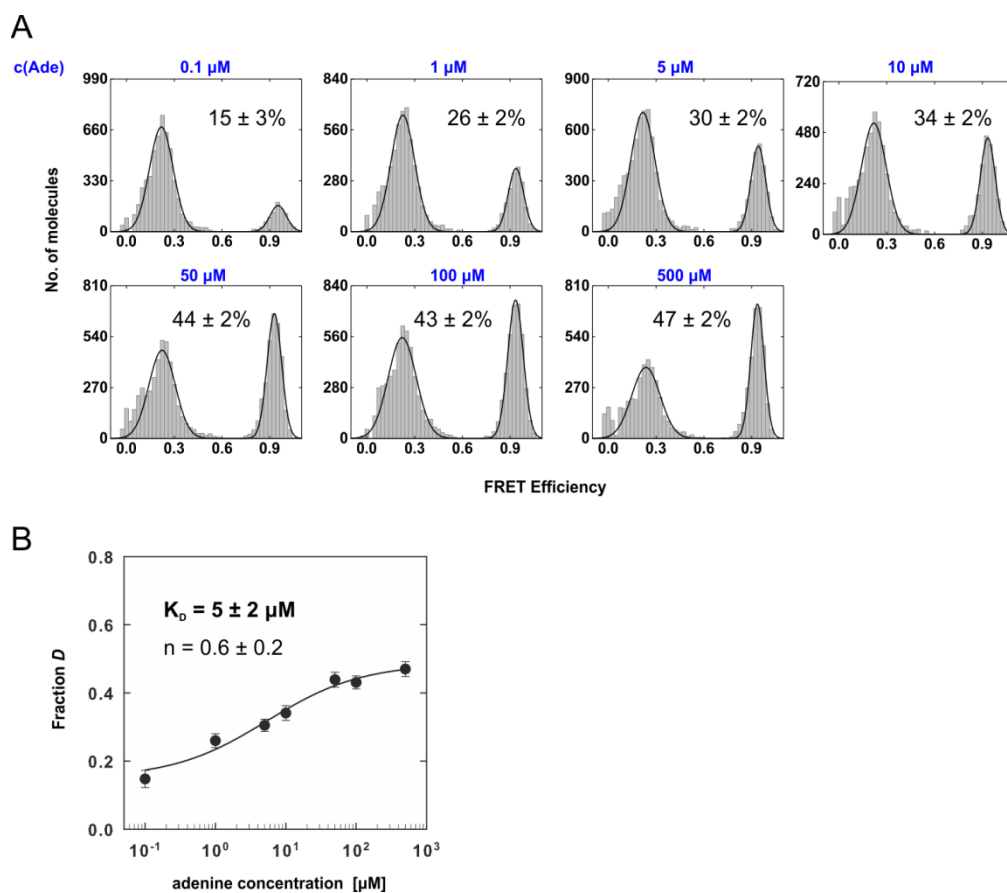

**Supplementary Figure S2. (A)** smFRET histogram analysis of adenine-dependent aptamer docking of the L2,L3-labeled full-length *add* Asw at 2 mM  $\text{Mg}^{2+}$ . The fractional population of the docked (high-FRET) state is indicated in percent. **(B)** Plot of the fractional population of the docked state determined from the FRET histograms shown in (A) as a function of the adenine concentration. The data have been fitted using the Hill equation to obtain the half-saturating adenine concentration for aptamer docking ( $K_D$ ) and the Hill coefficient ( $n$ ).

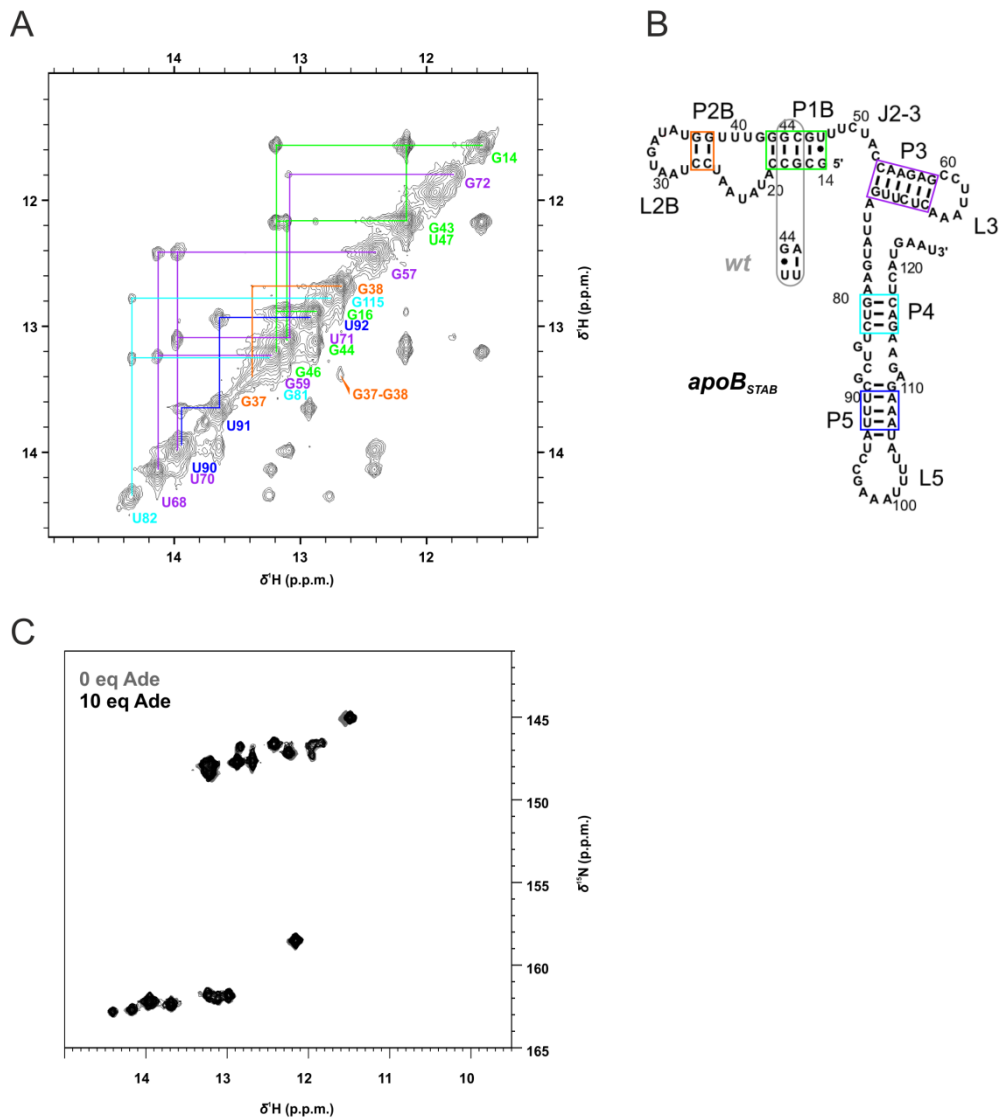

**Supplementary Figure S3.** (A) Imino region of the  $^1\text{H},^1\text{H}$ -NOESY spectrum of the apoB stabilized mutant apoB<sub>STAB</sub> of the *add* Asw (0.5 mM) without adenine and  $\text{Mg}^{2+}$  acquired at 900 MHz and 10 °C. Helices P1b, P2b, P3, P4 and P5 are indicated in green, orange, purple, cyan and blue, respectively. (B) Secondary structure model of apoB<sub>STAB</sub>. Mutated base pairs are highlighted in comparison to the wildtype. (C) Overlay of the imino region of the  $^1\text{H},^{15}\text{N}$ -HSQC spectra of apoB<sub>STAB</sub> (0.3 mM) without (grey) and with 10 eq adenine (black) in presence of 5 mM  $\text{Mg}^{2+}$  measured at 600 MHz and 10 °C. The spectra are superimposable and show that apoB<sub>STAB</sub> exhibits no adenine dependent base pairing structure.

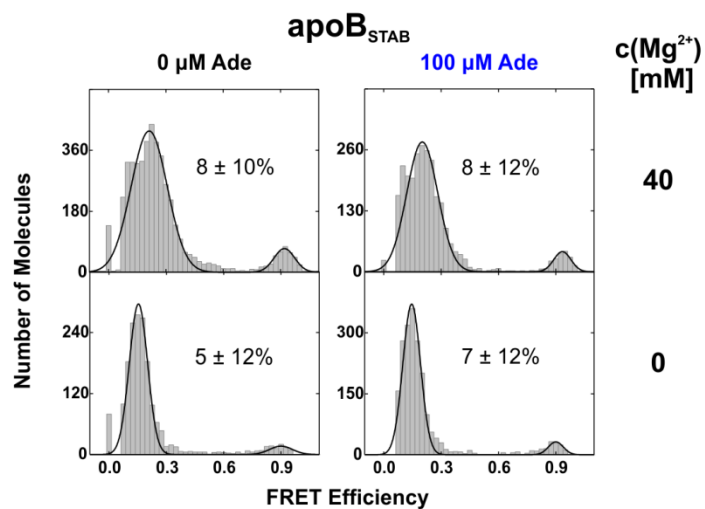

**Supplementary Figure S4.** smFRET histogram analysis of  $\text{Mg}^{2+}$ -dependent aptamer docking of L2,L3-labeled apoB<sub>STAB</sub> in absence and presence of 100  $\mu\text{M}$  adenine. The fractional population of the docked (high-FRET) state is indicated in percent.

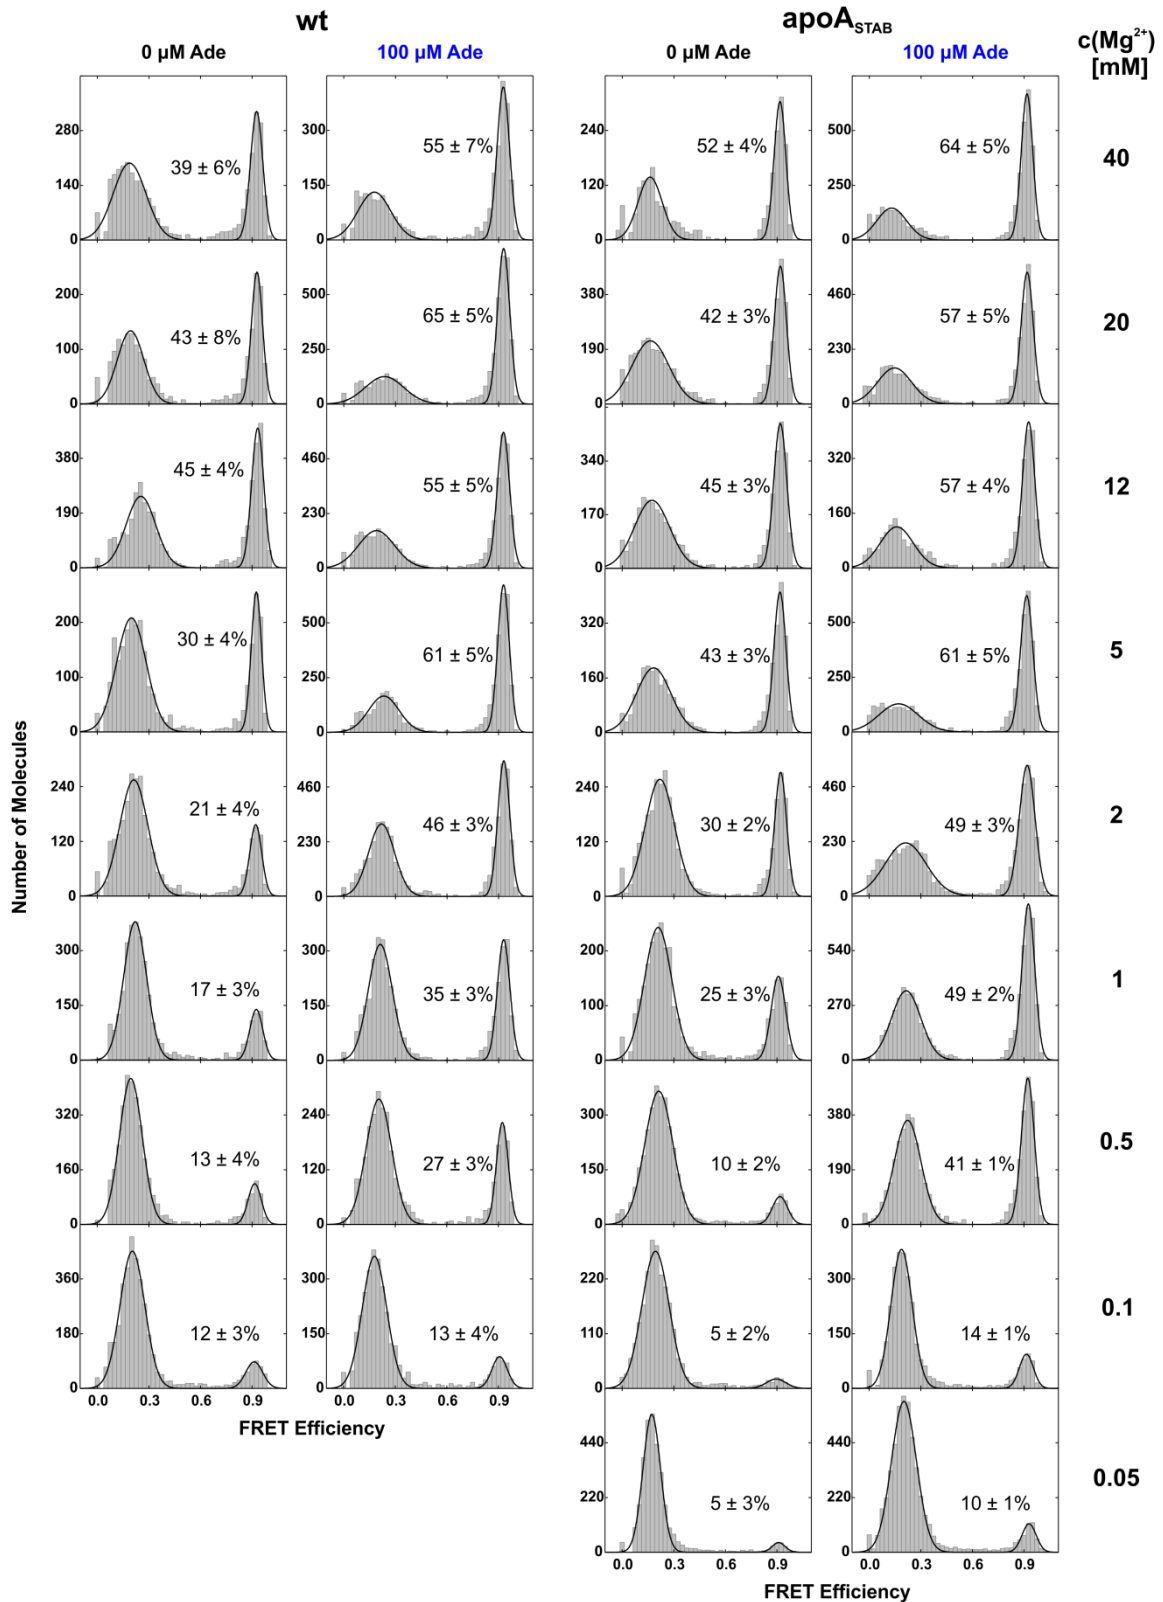

**Supplementary Figure S5.** smFRET histogram analysis of Mg<sup>2+</sup>-dependent aptamer docking of L2,L3-labeled wt and apoA<sub>STAB</sub> in absence and presence of 100 μM adenine. The fractional population of the docked (high-FRET) state is indicated in percent.



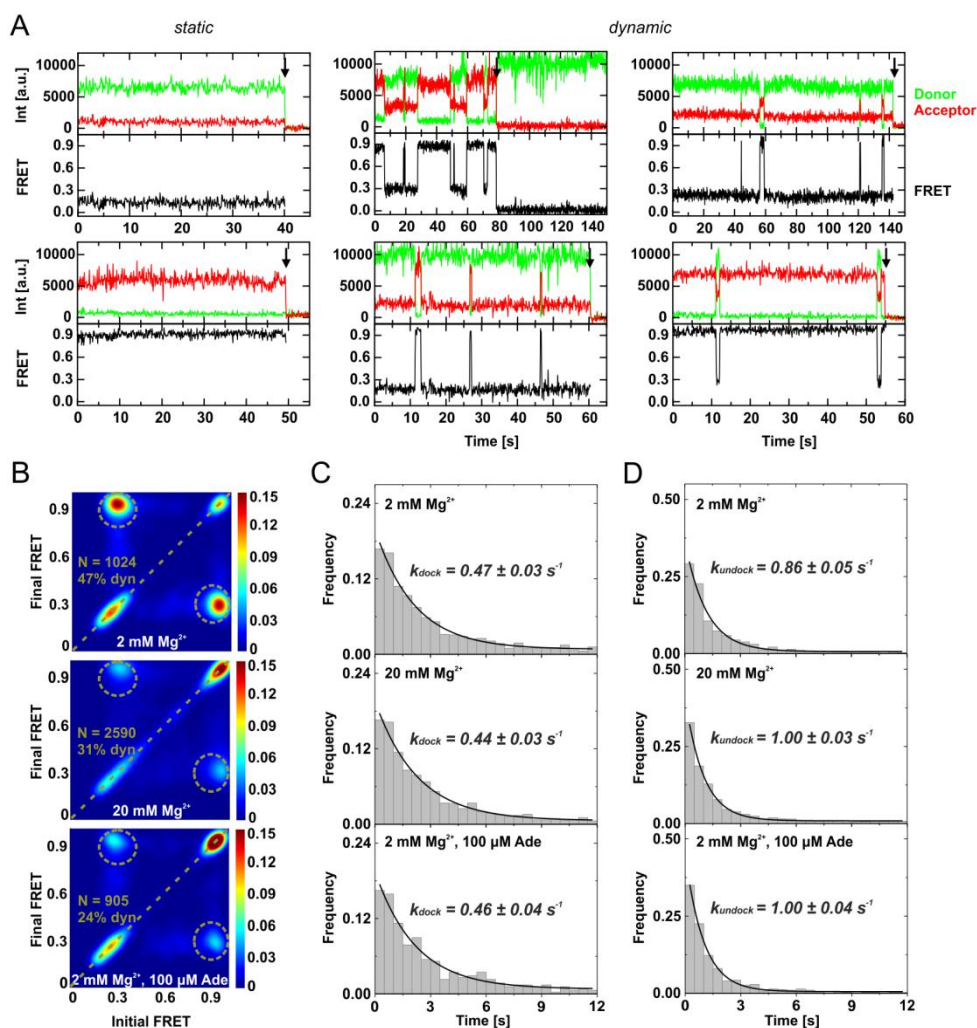

**Supplementary Figure S6.**  $Mg^{2+}$ - and adenine-dependent aptamer docking dynamics of the apoA-STAB mutant of the full-length *add* Asw analyzed by smFRET. **(A)** Representative smFRET time traces of L2/L3-labeled apoA-STAB collected at 2 mM  $Mg^{2+}$  without adenine. The aptamer domain of single riboswitches either statically remained in a long-lived undocked or docked state (left panel), or exhibited dynamics between short-lived and long-lived undocked and docked states (middle and right panel). Photobleaching events are indicated by a black arrow. **(B)** Transition occupancy density plots (TODPs) for smFRET traces collected at 2 mM  $Mg^{2+}$ , at 20 mM  $Mg^{2+}$  and at 2 mM  $Mg^{2+}$  with 100  $\mu M$  adenine. The fraction of molecules that exhibited dynamics (*dyn*) is indicated in percent. *N* indicates the number of traces included in each TODP. **(C)** Dwelltime histograms of the undocked state created from the dynamic smFRET traces designated in the corresponding TODP in (B). The data were fitted using single-exponential decay functions to extract the indicated docking rate constants. **(D)** Dwelltime histograms of the docked state created from the dynamic smFRET traces designated in the corresponding TODP in (B). The data were fitted using single-exponential decay functions to extract the indicated undocking rate constants.
